# Supplementary material for: Neural circuits underlying context-dependent competition between defensive actions in Drosophila larva
Source: bioRxiv preprint, doi:10.1101/2023.12.24.573276, version 1 (2023-12-25)
Supplement: Supplementary table 3 [file 573276_file05.xlsx]

## Sheet: 5s attP2ch5 vs 11A07ch5
attP2	run_large	Head-Cast	Static bend	stop_large	back_crawl_large	roll_large	small_motion	Head&Tail	C-shape	Hunch
run_large	0	0.540107	0.0213904	0	0	0	0.438503	0	0	0
Head-Cast	0.676056	0	0	0	0.0492958	0	0.274648	0	0	0
Static bend	0.307692	0	0	0.0769231	0	0	0.615385	0	0	0
stop_large	0	0	0	0	0	0	1	0	0	0
back_crawl_large	0	0.909091	0	0	0	0	0.0909091	0	0	0
roll_large	0	0	0	0	0	0	0	0	0	0
small_motion	0.5	0.429577	0.0352113	0	0.028169	0	0	0	0	0.00704225
Head&
C-shape	0	0	0	0	0	0	0	0	0	0
Hunch	0	0	0	0	0	0	1	0	0	0
R11A07	run_large	Head-Cast	Static bend	stop_large	back_crawl_large	roll_large	small_motion	Head&Tail	C-shape	Hunch
run_large	0	0.620321	0.0320856	0	0	0	0.326203	0	0.0213904	0
Head-Cast	0.293286	0	0	0	0.00706714	0.176678	0.522968	0	0	0
Static bend	0.142857	0	0	0	0	0.285714	0.571429	0	0	0
stop_large	0	0	0	0	0	0	0	0	0	0
back_crawl_large	0	0.8	0	0	0	0	0.2	0	0	0
roll_large	0	0.787234	0.0212766	0	0	0	0.0212766	0	0.170213	0
small_motion	0.297561	0.614634	0.00487805	0	0.0097561	0	0	0	0.0731707	0
Head&
C-shape	0.157895	0	0	0	0.0526316	0	0.789474	0	0	0
Hunch	0	0	0	0	0	0	0	0	0	0

## Sheet: 5s attP2ch10vs11A07ch10
attP2	run_large	Head-Cast	Static bend	stop_large	back_crawl_large	roll_large	small_motion	Head&Tail	C-shape	Hunch
run_large	0	0.625899	0.0143885	0	0	0	0.352518	0	0	0.00719424
Head-Cast	0.482517	0	0	0	0.0979021	0	0.41958	0	0	0
Static bend	0.5	0	0	0.25	0	0	0.25	0	0	0
stop_large	0	0	1	0	0	0	0	0	0	0
back_crawl_large	0	0.888889	0	0	0	0	0.111111	0	0	0
roll_large	0	0	0	0	0	0	0	0	0	0
small_motion	0.285714	0.642857	0.00793651	0	0.0555556	0	0	0.00793651	0	0
Head&
C-shape	0	0	0	0	0	0	0	0	0	0
Hunch	0	0	0	0	0	0	1	0	0	0
R11A07	run_large	Head-Cast	Static bend	stop_large	back_crawl_large	roll_large	small_motion	Head&Tail	C-shape	Hunch
run_large	0	0.775	0	0	0	0	0.0875	0	0.1	0.0375
Head-Cast	0.0266667	0	0	0	0	0.537778	0.431111	0.00444444	0	0
Static bend	0	0	0	0	0	0.166667	0.833333	0	0	0
stop_large	0	0	0	0	0	0	0	0	0	0
back_crawl_large	0	0	0	0	0	0	0	0	1	0
roll_large	0	0.4	0.0121212	0	0	0	0.0424242	0.030303	0.515152	0
small_motion	0.0166667	0.422222	0.0111111	0	0	0.0333333	0	0.0166667	0.5	0
Head&
C-shape	0	0.0205479	0	0	0.00684932	0.609589	0.356164	0	0	0.00684932
Hunch	0	0	0.25	0	0	0	0	0	0.75	0

## Sheet: 5s attP2ch17vs11A07ch17
attP2	run_large	Head-Cast	Static bend	stop_large	back_crawl_large	roll_large	small_motion	Head&Tail	C-shape	Hunch
run_large	0	0.60101	0.113636	0	0.00505051	0	0.277778	0	0	0.00252525
Head-Cast	0.561728	0	0	0	0.0771605	0.00308642	0.354938	0	0	0.00308642
Static bend	0.620253	0	0	0	0.0379747	0	0.341772	0	0	0
stop_large	0	0	0	0	0	0	1	0	0	0
back_crawl_large	0	0.704918	0.147541	0	0	0	0.131148	0	0.0163934	0
roll_large	0	0	0	0	0	0	0	0	0	0
small_motion	0.338078	0.480427	0.0818505	0.0142349	0.0854093	0	0	0	0	0
Head&
C-shape	0	0	0	0	0	0	1	0	0	0
Hunch	0	0	0	0	0.333333	0	0.666667	0	0	0
R11A07	run_large	Head-Cast	Static bend	stop_large	back_crawl_large	roll_large	small_motion	Head&Tail	C-shape	Hunch
run_large	0	0.00925926	0	0	0.00925926	0	0.0648148	0.268519	0.62963	0.0185185
Head-Cast	0	0	0	0	0	0.789474	0.184211	0.0263158	0	0
Static bend	0	0	0	0	0	0.333333	0.333333	0.333333	0	0
stop_large	0	0	0	0	0	0	1	0	0	0
back_crawl_large	0	0	0	0	0	0	0	0.166667	0.833333	0
roll_large	0	0.00833333	0	0	0.00833333	0	0.025	0.075	0.883333	0
small_motion	0	0	0.00980392	0.0196078	0	0.0686275	0	0.156863	0.705882	0.0392157
Head&
C-shape	0.0282486	0	0	0	0	0.59887	0.367232	0	0	0.00564972
Hunch	0	0	0	0	0	0.0909091	0.272727	0	0.636364	0

## Sheet: 5s attP2p4ch5vs11A07p4ch5
attP2	run_large	Head-Cast	Static bend	stop_large	back_crawl_large	roll_large	small_motion	Head&Tail	C-shape	Hunch
run_large	0	0.266667	0.0333333	0	0.0111111	0	0.455556	0	0	0.233333
Head-Cast	0.0393701	0	0	0	0.212598	0	0.708661	0.00787402	0	0.0314961
Static bend	0	0	0	0	0.0588235	0	0.941176	0	0	0
stop_large	0	0	0	0	0	0	0	0	0	0
back_crawl_large	0.0185185	0.518519	0.166667	0	0	0	0.277778	0.0185185	0	0
roll_large	0	0	0	0	0	0	0	0	0	0
small_motion	0.0248756	0.597015	0.159204	0	0.159204	0	0	0	0.0149254	0.0447761
Head&
C-shape	0	0	0	0	0	0	1	0	0	0
Hunch	0.0238095	0.333333	0.0714286	0	0	0	0.571429	0	0	0
R11A07	run_large	Head-Cast	Static bend	stop_large	back_crawl_large	roll_large	small_motion	Head&Tail	C-shape	Hunch
run_large	0	0.342105	0.0263158	0	0	0	0.131579	0.0526316	0.0789474	0.368421
Head-Cast	0.1875	0	0	0.0104167	0.03125	0.104167	0.59375	0.03125	0.0208333	0.0208333
Static bend	0.142857	0	0	0.0714286	0	0.0714286	0.642857	0	0	0.0714286
stop_large	0	0	0	0	0	0	1	0	0	0
back_crawl_large	0	0.857143	0	0	0	0	0	0	0.142857	0
roll_large	0	0.538462	0	0	0	0	0	0.0769231	0.384615	0
small_motion	0.0552147	0.466258	0.0981595	0.0245399	0.0245399	0	0	0.00613497	0.282209	0.0429448
Head&
C-shape	0.0833333	0.0555556	0.0277778	0	0.0277778	0.222222	0.583333	0	0	0
Hunch	0	0.307692	0.134615	0	0	0	0.384615	0	0.173077	0

## Sheet: 5s attP2p4ch10vs11A07p4ch10
attP2	run_large	Head-Cast	Static bend	stop_large	back_crawl_large	roll_large	small_motion	Head&Tail	C-shape	Hunch
run_large	0	0.27907	0.0232558	0	0.0465116	0	0.348837	0	0	0.302326
Head-Cast	0.0172414	0	0	0	0.155172	0	0.775862	0	0	0.0517241
Static bend	0.0588235	0	0	0	0.235294	0	0.705882	0	0	0
stop_large	0	0	0	0	0	0	0	0	0	0
back_crawl_large	0	0.375	0.166667	0	0	0	0.458333	0	0	0
roll_large	0	0	0	0	0	0	0	0	0	0
small_motion	0.0204082	0.540816	0.265306	0	0.112245	0	0	0.0102041	0	0.0510204
Head&
C-shape	0	0	0	0	0.333333	0	0.666667	0	0	0
Hunch	0	0.333333	0.25	0	0	0	0.333333	0	0.0833333	0
R11A07	run_large	Head-Cast	Static bend	stop_large	back_crawl_large	roll_large	small_motion	Head&Tail	C-shape	Hunch
run_large	0	0.0724638	0.0434783	0	0	0	0.115942	0.202899	0.347826	0.217391
Head-Cast	0	0	0	0	0	0.36	0.56	0.04	0	0.04
Static bend	0	0	0	0.142857	0	0.0714286	0.642857	0.142857	0	0
stop_large	0	0	0.2	0	0	0	0.6	0	0.2	0
back_crawl_large	0	0	0	0	0	0	0	0	0	0
roll_large	0	0.342105	0	0	0	0	0	0.0789474	0.552632	0.0263158
small_motion	0	0.198276	0.155172	0.0258621	0	0	0	0.0603448	0.525862	0.0344828
Head&
C-shape	0	0	0.0416667	0	0	0.527778	0.430556	0	0	0
Hunch	0.027027	0.162162	0.0810811	0.027027	0	0.027027	0.297297	0	0.378378	0

## Sheet: 5s attP2p4ch17vs11A07p4ch17
attP2	run_large	Head-Cast	Static bend	stop_large	back_crawl_large	roll_large	small_motion	Head&Tail	C-shape	Hunch
run_large	0	0.163265	0.0612245	0	0.0408163	0	0.397959	0.0102041	0	0.326531
Head-Cast	0.0677966	0	0	0	0.135593	0	0.771186	0.0169492	0	0.00847458
Static bend	0	0	0	0	0.0833333	0	0.875	0	0	0.0416667
stop_large	0.5	0	0.5	0	0	0	0	0	0	0
back_crawl_large	0.037037	0.407407	0.259259	0	0	0	0.296296	0	0	0
roll_large	0	0	0	0	0	0	0	0	0	0
small_motion	0.0204082	0.545918	0.280612	0.0102041	0.0408163	0	0	0.00510204	0.0255102	0.0714286
Head&
C-shape	0	0	0	0	0.5	0	0.5	0	0	0
Hunch	0.016129	0.241935	0.16129	0	0	0	0.564516	0	0.016129	0
R11A07	run_large	Head-Cast	Static bend	stop_large	back_crawl_large	roll_large	small_motion	Head&Tail	C-shape	Hunch
run_large	0	0.0989011	0.021978	0.010989	0	0	0.032967	0.120879	0.450549	0.263736
Head-Cast	0.00925926	0	0	0.00925926	0	0.583333	0.277778	0.0740741	0.00925926	0.037037
Static bend	0	0	0	0.0454545	0.0454545	0.636364	0.272727	0	0	0
stop_large	0	0	0.5	0	0	0	0.25	0	0.25	0
back_crawl_large	0	0	0	0	0	0	0	0	1	0
roll_large	0	0.234375	0.09375	0	0	0	0	0.046875	0.625	0
small_motion	0.00645161	0.187097	0.0709677	0.00645161	0	0	0	0.0645161	0.606452	0.0580645
Head&
C-shape	0	0.0148515	0.039604	0	0	0.608911	0.331683	0.0049505	0	0
Hunch	0	0.0816327	0.183673	0	0	0	0.306122	0.0204082	0.408163	0

## Sheet: 5s attP2p5ch5vs11A07p5ch5
attP2	run_large	Head-Cast	Static bend	stop_large	back_crawl_large	roll_large	small_motion	Head&Tail	C-shape	Hunch
run_large	0	0.0846154	0.0307692	0	0.0153846	0	0.153846	0.0153846	0.1	0.6
Head-Cast	0.0299401	0	0.00598802	0	0.191617	0	0.652695	0.011976	0.00598802	0.101796
Static bend	0	0	0	0	0.0789474	0	0.868421	0.0526316	0	0
stop_large	0	0	0	0	0	0	0	0	0	0
back_crawl_large	0	0.404255	0.276596	0	0	0	0.255319	0	0.0638298	0
roll_large	0	0	0	0	0	0	0	0	0	0
small_motion	0.0148148	0.518519	0.288889	0	0.0518519	0	0	0	0.0185185	0.107407
Head&
C-shape	0	0.133333	0.1	0	0.0333333	0	0.733333	0	0	0
Hunch	0	0.414286	0.15	0	0	0	0.378571	0	0.0571429	0
R11A07	run_large	Head-Cast	Static bend	stop_large	back_crawl_large	roll_large	small_motion	Head&
run_large	0	0.219178	0.0136986	0	0.0273973	0	0.164384	0.0273973	0.136986	0.410959
Head-Cast	0.103448	0	0.0172414	0.0172414	0.0344828	0.103448	0.482759	0.0862069	0.0172414	0.137931
Static bend	0	0	0	0.0666667	0.0333333	0	0.866667	0.0333333	0	0
stop_large	0	0	0.75	0	0	0	0.25	0	0	0
back_crawl_large	0	0.125	0.5	0	0	0	0.375	0	0	0
roll_large	0	0.142857	0.142857	0	0	0	0	0	0.714286	0
small_motion	0.020979	0.244755	0.384615	0.013986	0.00699301	0	0	0.0559441	0.153846	0.118881
Head&
C-shape	0	0.117647	0.264706	0	0	0.117647	0.5	0	0	0
Hunch	0	0.202247	0.382022	0	0.011236	0	0.202247	0.011236	0.191011	0

## Sheet: 5s attP2p5ch10vs11A07p5ch10
attP2	run_large	Head-Cast	Static bend	stop_large	back_crawl_large	roll_large	small_motion	Head&Tail	C-shape	Hunch
run_large	0	0.031746	0.0634921	0	0	0	0.206349	0.015873	0.031746	0.650794
Head-Cast	0.0555556	0	0.0277778	0	0.0277778	0	0.666667	0.0277778	0	0.194444
Static bend	0.030303	0	0	0.030303	0	0	0.787879	0.0606061	0	0.0909091
stop_large	0	0	0.5	0	0	0	0.5	0	0	0
back_crawl_large	0	0	0.5	0	0	0	0.5	0	0	0
roll_large	0	0	0	0	0	0	0	0	0	0
small_motion	0.00847458	0.228814	0.576271	0.00847458	0	0	0	0	0.0169492	0.161017
Head&
C-shape	0	0.25	0	0	0	0	0.75	0	0	0
Hunch	0.0133333	0.12	0.36	0	0	0	0.493333	0	0.0133333	0
R11A07	run_large	Head-Cast	Static bend	stop_large	back_crawl_large	roll_large	small_motion	Head&Tail	C-shape	Hunch
run_large	0	0.0588235	0.0294118	0	0	0	0.117647	0.147059	0.264706	0.382353
Head-Cast	0	0	0	0	0.0714286	0.0714286	0.464286	0.321429	0	0.0714286
Static bend	0	0	0	0.0952381	0.047619	0.142857	0.666667	0.047619	0	0
stop_large	0	0	1	0	0	0	0	0	0	0
back_crawl_large	0	0	0.5	0	0	0	0.5	0	0	0
roll_large	0	0.384615	0.230769	0	0	0	0	0	0.384615	0
small_motion	0	0.148936	0.297872	0.0319149	0	0	0	0.0744681	0.361702	0.0851064
Head&
C-shape	0	0.0571429	0.142857	0	0	0.428571	0.371429	0	0	0
Hunch	0	0.157895	0.157895	0	0	0	0.342105	0	0.342105	0

## Sheet: 5s attP2p5ch17vs11A07p5ch17
attP2	run_large	Head-Cast	Static bend	stop_large	back_crawl_large	roll_large	small_motion	Head&Tail	C-shape	Hunch
run_large	0	0.167969	0.0820312	0.0078125	0.0195312	0	0.320312	0.0234375	0.0078125	0.371094
Head-Cast	0.025	0	0	0.00833333	0.129167	0	0.7375	0.025	0	0.075
Static bend	0.0140187	0.0046729	0	0.0373832	0.0700935	0	0.841121	0	0	0.0327103
stop_large	0	0.04	0.36	0	0	0	0.6	0	0	0
back_crawl_large	0.021978	0.362637	0.351648	0	0	0	0.252747	0	0	0.010989
roll_large	0	0	0	0	0	0	0	0	0	0
small_motion	0.0107034	0.264526	0.529052	0.0229358	0.0825688	0	0	0.00764526	0.00611621	0.0764526
Head&
C-shape	0	0	0.25	0	0	0	0.75	0	0	0
Hunch	0.0107143	0.164286	0.289286	0	0.00357143	0	0.514286	0	0.0178571	0
R11A07	run_large	Head-Cast	Static bend	stop_large	back_crawl_large	roll_large	small_motion	Head&Tail	C-shape	Hunch
run_large	0	0.0608696	0.0695652	0	0	0	0.182609	0.304348	0.26087	0.121739
Head-Cast	0	0	0	0	0	0.294118	0.529412	0.117647	0.0588235	0
Static bend	0	0	0	0.0357143	0	0.107143	0.821429	0.0357143	0	0
stop_large	0	0	0	0	0	0	0.75	0	0.25	0
back_crawl_large	0	0	0	0	0	0	0	0	0	0
roll_large	0	0	0.111111	0	0	0	0	0	0.888889	0
small_motion	0.00746269	0.0970149	0.432836	0.0223881	0	0	0	0.141791	0.261194	0.0373134
Head&
C-shape	0	0.0444444	0.133333	0	0	0.422222	0.4	0	0	0
Hunch	0	0.0454545	0.454545	0	0	0	0.318182	0	0.181818	0

## Sheet: 3s attP2ch17vs11A07ch17
attP2	run_large	Head-Cast	Static bend	stop_large	back_crawl_large	roll_large	small_motion	Head&Tail	C-shape	Hunch
run_large	0	0.629091	0.130909	0	0.00727273	0	0.232727	0	0	0
Head-Cast	0.527778	0	0	0	0.0888889	0	0.377778	0	0	0.00555556
Static bend	0.428571	0	0	0	0.0714286	0	0.5	0	0	0
stop_large	0	0	0	0	0	0	1	0	0	0
back_crawl_large	0	0.694444	0.138889	0	0	0	0.138889	0	0.0277778	0
roll_large	0	0	0	0	0	0	0	0	0	0
small_motion	0.309524	0.482143	0.0952381	0.0178571	0.0952381	0	0	0	0	0
Head&	0	0	0	0	0	0	0	0	0	0
C-shape	0	0	0	0	0	0	0	0	0	0
Hunch	0	0	0	0	0	0	1	0	0	0
R11A07	run_large	Head-Cast	Static bend	stop_large	back_crawl_large	roll_large	small_motion	Head&Tail	C-shape	Hunch
run_large	0	0.00943396	0	0	0.00943396	0	0.0566038	0.273585	0.632075	0.0188679
Head-Cast	0	0	0	0	0	0.833333	0.133333	0.0333333	0	0
Static bend	0	0	0	0	0	0.333333	0.333333	0.333333	0	0
stop_large	0	0	0	0	0	0	0	0	0	0
back_crawl_large	0	0	0	0	0	0	0	0	1	0
roll_large	0	0	0	0	0	0	0	0.111111	0.888889	0
small_motion	0	0	0.0149254	0.0149254	0	0.0746269	0	0.208955	0.626866	0.0597015
Head&	0	0	0	0	0.0163934	0.0655738	0.163934	0	0.754098	0
C-shape	0	0	0	0	0	0.704082	0.285714	0	0	0.0102041
Hunch	0	0	0	0	0	0.0909091	0.272727	0	0.636364	0

[truncated: 1 more sheets: 3s attP2p4ch17vs11A07p4ch17]
